# Supplementary figures and images for: Establishing the role of ATP for the function of the RIG-I innate immune sensor
Source: eLife journal article supplement (doi:10.7554/elife.09391), 2015-09-15

Supplementary Figure 3/  
Figure 3 - Figure Supplement 2

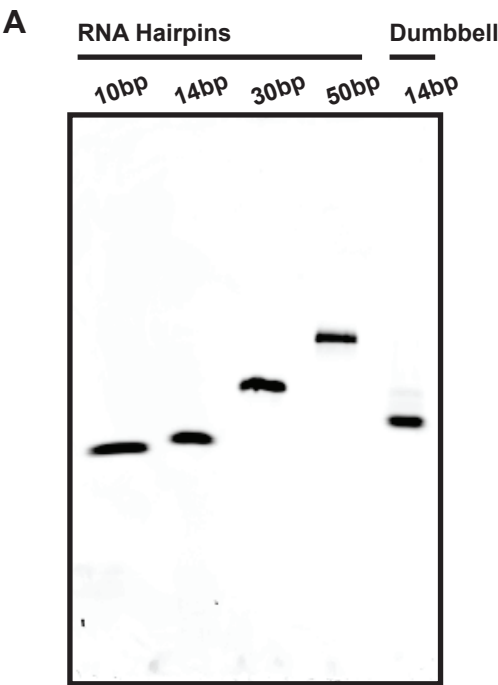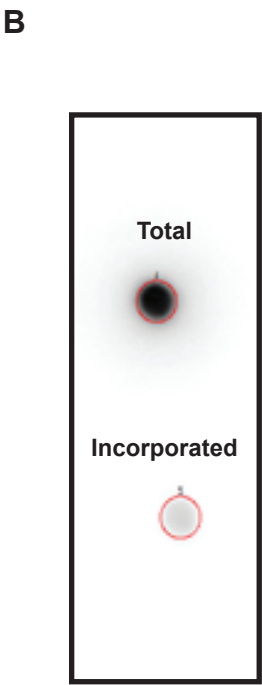

Supplement: supp [file elife-09391-supp-v1.zip]

Supplementary Figure 4/  
Figure 5 - Figure Supplement 1

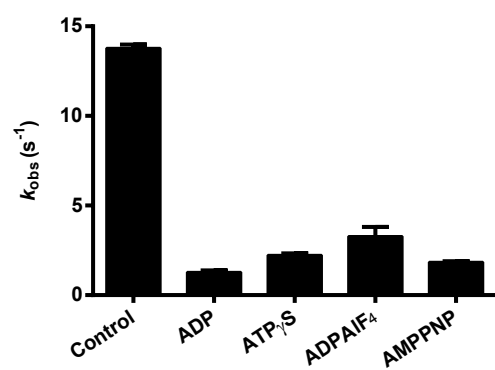

Supplement: supp [file elife-09391-supp-v1.zip]

Supplementary Figure 2/  
Figure 3 - Figure Supplement 1

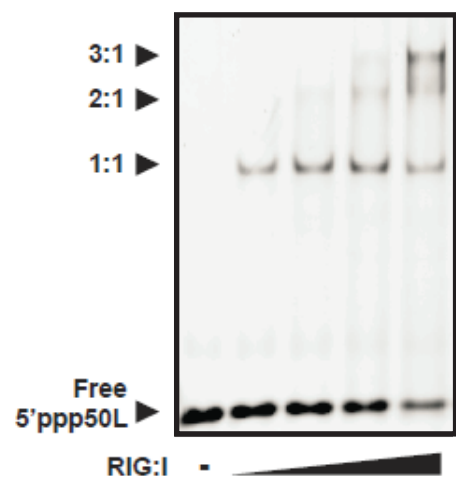

Supplement: supp [file elife-09391-supp-v1.zip]

Supplementary Figure 1/  
Figure 2 - Figure Supplement 1

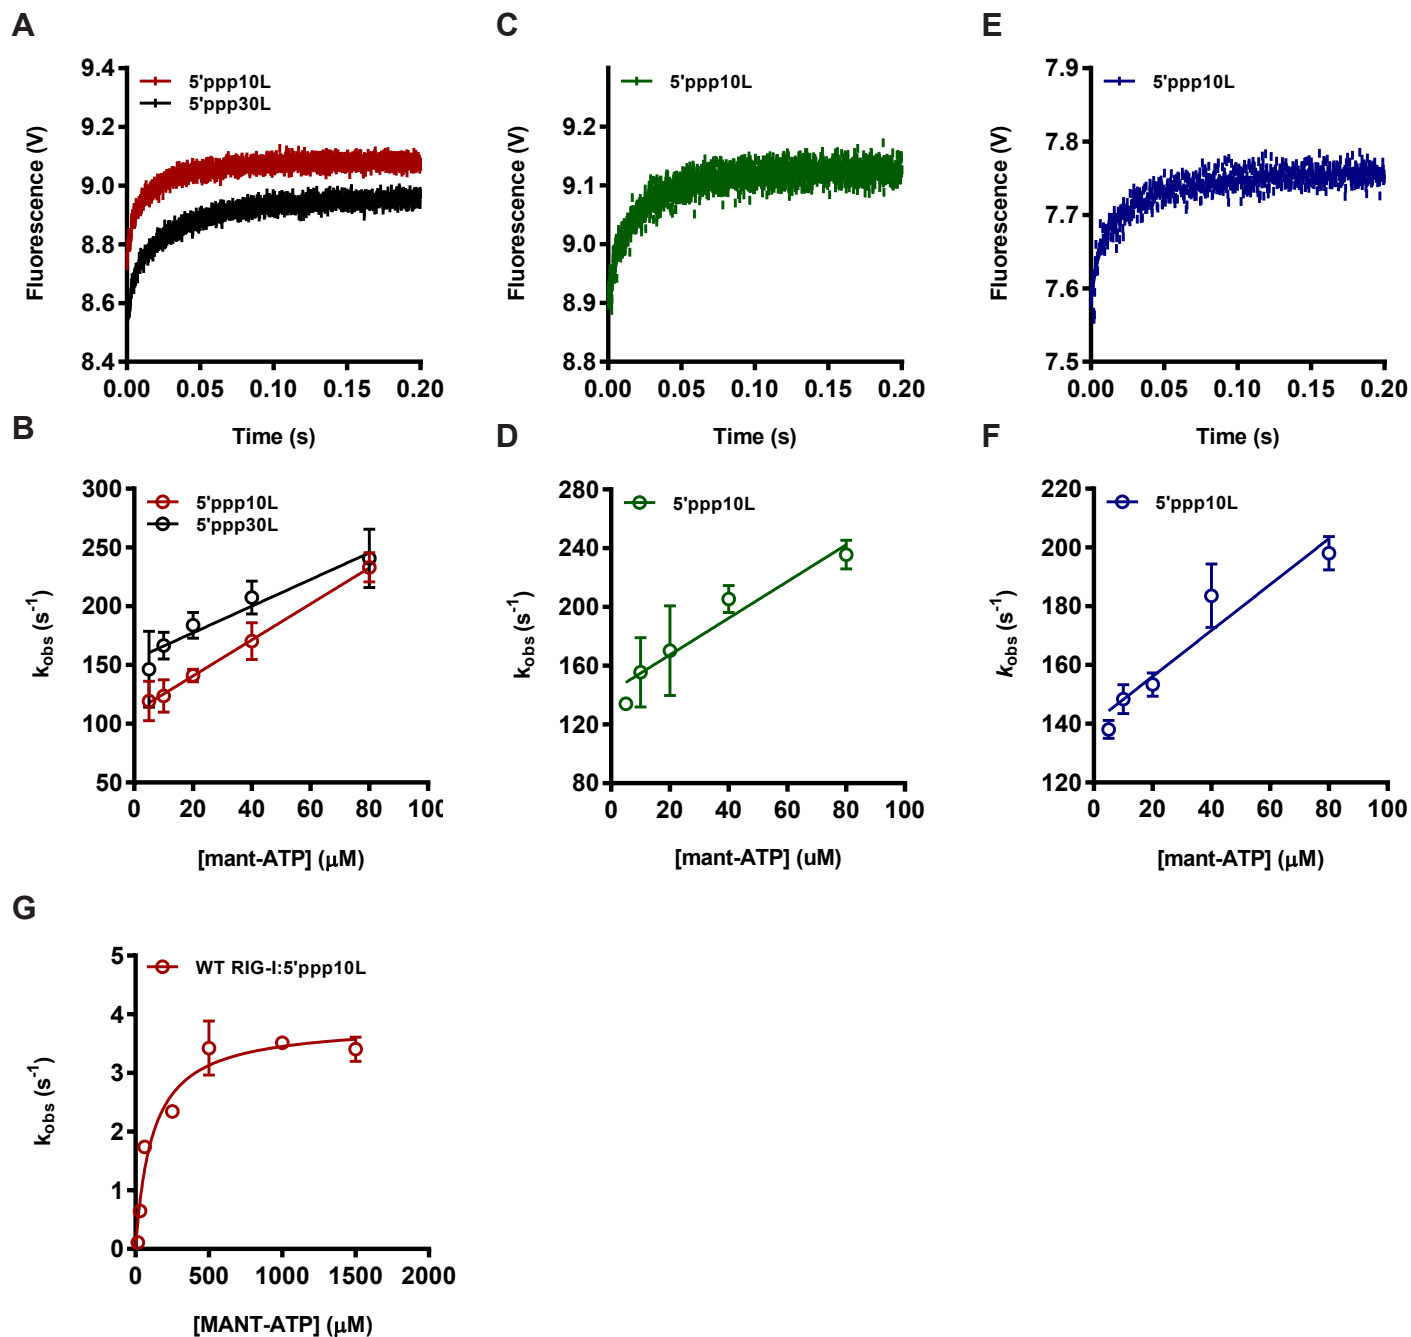

Supplement: supp [file elife-09391-supp-v1.zip]
